# The coefficient of determination $R^2$ and intra-class correlation coefficient from generalized linear mixed-effects models revisited and expanded

---

Shinichi Nakagawa<sup>1,2</sup>, Paul C. D. Johnson<sup>3</sup> and Holger Schielzeth<sup>4</sup>

<sup>1</sup> Evolution & Ecology Research Centre, and School of Biological, Earth & Environmental Sciences, University of New South Wales, Sydney, NSW 2052, Australia

<sup>2</sup> Diabetes and Metabolism Division, Garvan Institute of Medical Research, Sydney, NSW 2010, Australia

<sup>3</sup> Institute of Biodiversity, Animal Health and Comparative Medicine, University of Glasgow, Graham Kerr Building, Glasgow G12 8QQ, UK

<sup>4</sup> Population Ecology Group, Institute of Ecology, Friedrich Schiller University Jena, Dornburger Str. 159, 07743 Jena, Germany

Running head:  $R^2$  and ICC from GLMMs

Address correspondence to S. Nakagawa. Email: [s.nakagawa@unsw.edu.au](mailto:s.nakagawa@unsw.edu.au); H. Schielzeth. Email: [holger.schielzeth@uni-jena.de](mailto:holger.schielzeth@uni-jena.de)

## 1 **Abstract**

2 The coefficient of determination  $R^2$  quantifies the proportion of variance explained by a statistical  
3 model and is an important summary statistic of biological interest. However, estimating  $R^2$  for  
4 generalized linear mixed models (GLMMs) remains challenging. We have previously introduced a  
5 version of  $R^2$  that we called  $R^2_{\text{GLMM}}$  for Poisson and binomial GLMMs, but not for other  
6 distributional families. Similarly, we earlier discussed how to estimate intra-class correlation  
7 coefficients ICC using Poisson and binomial GLMMs. In this article, we expand our methods to all  
8 other non-Gaussian distributions, in particular to negative binomial and gamma distributions that  
9 are commonly used for modelling biological data. While expanding our approach, we highlight two  
10 useful concepts for biologists, Jensen's inequality and the delta method, both of which help us in  
11 understanding the properties of GLMMs. Jensen's inequality has important implications for  
12 biologically meaningful interpretation of GLMMs, while the delta method allows a general  
13 derivation of variance associated with non-Gaussian distributions. We also discuss some special  
14 considerations for binomial GLMMs with binary or proportion data. We illustrate the  
15 implementation of our extension by worked examples from the field of ecology and evolution in the  
16 R environment. However, our method can be used across disciplines and regardless of statistical  
17 environments.

18 **Key words:** *repeatability, heritability, goodness of fit, model fit, variance decomposition, reliability*  
19 *analysis.*

20

21

## 22 **1. Introduction**

23 One of the main purposes of linear modelling is to understand the sources of variation in biological  
24 data. In this context, it is not surprising that the coefficient of determination  $R^2$  is a commonly  
25 reported statistic because it represents the proportion of variance explained by a linear model. The  
26 intra-class correlation coefficient ICC is a related statistic that quantifies the proportion of variance  
27 explained by a grouping (random) factor in multilevel/hierarchical data. In the field of ecology and  
28 evolution, a type of ICC is often referred to as repeatability R, where the grouping factor is often  
29 individuals that have been phenotyped repeatedly [1, 2]. We have reviewed methods for estimating  
30  $R^2$  and ICC in the past, with a particular focus on non-Gaussian response variables in the context of  
31 biological data [2, 3]. These previous articles featured generalized linear mixed-effects models  
32 (GLMMs) as the most versatile engine for estimating  $R^2$  and ICC (specifically  $R^2_{\text{GLMM}}$  and  
33  $\text{ICC}_{\text{GLMM}}$ ). Our descriptions were limited to random-intercept GLMMs, but Johnson [4] has  
34 recently extended the methods to random-slope GLMMs, widening the applicability of these  
35 statistics (see also, [5, 6]).

36 However, at least one important issue seems to remain. Currently these two statistics are only  
37 described for binomial and Poisson GLMMs. Although these two types of GLMMs are arguably the  
38 most popular [7], there are other families of distributions that are commonly used in biology, such  
39 as negative binomial and gamma distributions [8, 9]. In this article, we revisit and extend  $R^2_{\text{GLMM}}$   
40 and  $\text{ICC}_{\text{GLMM}}$  to more distributional families with a particular focus on negative binomial and  
41 gamma distributions. In this context, we discuss Jensen's inequality and two variants of the delta  
42 method, which are hardly known among biologists. These concepts are useful not only for  
43 generalizing our previous methods, but also for interpreting the results of GLMMs. Furthermore,  
44 we refer to some special considerations when obtaining  $R^2_{\text{GLMM}}$  and  $\text{ICC}_{\text{GLMM}}$  from binomial  
45 GLMMs for binary and proportion data, which we did not discuss in the past [2, 3]. We provide  
46 worked examples inspired from the field of ecology and evolution, focusing on implementation in

47 the R environment [10] and finish by referring to two alternative approaches for obtaining  $R^2$  and  
48 ICC from GLMMs along with a cautionary note.

## 49 **2. Definitions of $R^2_{\text{GLMM}}$ , $\text{ICC}_{\text{GLMM}}$ and overdispersion**

50 To start with, we present  $R^2_{\text{GLMM}}$  and  $\text{ICC}_{\text{GLMM}}$  for a simple case of Gaussian error distributions  
51 based on a linear mixed-effects model (LMM, hence also referred to as  $R^2_{\text{LMM}}$  and  $\text{ICC}_{\text{LMM}}$ ).  
52 Imagine a two-level dataset where the first level corresponds to observations and the second level to  
53 some grouping/clustering factor (e.g. individuals with repeated measurements) with  $k$  fixed effect  
54 covariates. The model can be written as (referred to as Model 1):

$$55 \quad y_{ij} = \beta_0 + \sum_{h=1}^k \beta_h x_{hij} + \alpha_i + \varepsilon_{ij}, \quad (2.1)$$

$$56 \quad \alpha_i \sim \text{Gaussian}(0, \sigma_\alpha^2), \quad (2.2)$$

$$57 \quad \varepsilon_{ij} \sim \text{Gaussian}(0, \sigma_\varepsilon^2), \quad (2.3)$$

58 where  $y_{ij}$  is the  $j$ th observation of the  $i$ th individual,  $x_{hij}$  is the  $j$ th value of the  $i$ th individual for the  
59  $h$ th of  $k$  fixed effects predictors,  $\beta_0$  is the (grand) intercept,  $\beta_h$  is the regression coefficient for the  
60  $h$ th predictor,  $\alpha_i$  is an individual-specific effect, assumed to be normally distributed in the  
61 population with the mean and variance of 0 and  $\sigma_\alpha^2$ ,  $\varepsilon_{ij}$  is an observation-specific residual, assumed  
62 to be normally distributed in the population with mean and variance of 0 and  $\sigma_\varepsilon^2$ , respectively. For  
63 this model, we can define two types of  $R^2$  as:

$$64 \quad R^2_{\text{LMM}(m)} = \frac{\sigma_f^2}{\sigma_f^2 + \sigma_\alpha^2 + \sigma_\varepsilon^2}, \quad (2.4)$$

$$65 \quad R^2_{\text{LMM}(c)} = \frac{\sigma_f^2 + \sigma_\alpha^2}{\sigma_f^2 + \sigma_\alpha^2 + \sigma_\varepsilon^2}, \quad (2.5)$$

$$66 \quad \sigma_f^2 = \text{var}\left(\sum_h^k \beta_h x_{hij}\right), \quad (2.6)$$

67 where  $R_{\text{LMM}(m)}^2$  represents the marginal  $R^2$ , which is the proportion of the total variance explained by  
68 the fixed effects,  $R_{\text{LMM}(c)}^2$  represents the conditional  $R^2$ , which is the proportion of the variance  
69 explained by both fixed and random effects, and  $\sigma_f^2$  is the variance explained by fixed effects [11].  
70 Since marginal and conditional  $R^2$  differ only in whether the random effect variance is included in  
71 the numerator, we avoid redundancy and present equations only for marginal  $R^2$  in the following.  
72 Similarly, there are two types of ICC:

$$73 \quad \text{ICC}_{\text{LMM}(\text{adj})} = \frac{\sigma_\alpha^2}{\sigma_\alpha^2 + \sigma_\varepsilon^2} \quad (2.7)$$

$$74 \quad \text{ICC}_{\text{LMM}} = \frac{\sigma_\alpha^2}{\sigma_\alpha^2 + \sigma_f^2 + \sigma_\varepsilon^2} \quad (2.8)$$

75 If no fixed effects are fitted (other than the intercept),  $\sigma_f^2 = 0$  so that  $\text{ICC}_{\text{LMM}(\text{adj})}$  equals  $\text{ICC}_{\text{LMM}}$ . In  
76 such a case, the ICC should not be called ‘adjusted’ (*sensu* [2]). For an ICC value to be adjusted for  
77 a source of variance, that variance must be more than 0 and omitted from the ICC calculation. Since  
78 the two versions of ICC differ only in whether the fixed effect variance, calculated as in equation  
79 (2.6), is included in the denominator, we avoid redundancy and present equations only for adjusted  
80 ICC in the following.

81 One of the main difficulties in extending  $R^2$  from LMMs to GLMMs is defining the residual  
82 variance  $\sigma_\varepsilon^2$ . For binomial and Poisson GLMMs with an additive dispersion term, we have  
83 previously stated that  $\sigma_\varepsilon^2$  is equivalent to  $\sigma_e^2 + \sigma_d^2$  where  $\sigma_e^2$  is the variance for the additive  
84 overdispersion term, and  $\sigma_d^2$  is the distribution-specific variance [2, 3]. Here, overdispersion  
85 represents the excess variation relative to what is expected from a certain distribution and can be  
86 estimated by fitting an observation-level random effect (OLRE; see, [12, 13]). Alternatively,  
87 overdispersion in GLMMs can be implemented using a multiplicative overdispersion term [14]. In  
88 such an implementation, we stated that  $\sigma_\varepsilon^2$  is equivalent to  $\omega \cdot \sigma_d^2$  where  $\omega$  is a multiplicative

89 dispersion parameter estimated from the model [2]. However, obtaining  $\sigma_d^2$  for specific  
90 distributions is not always possible, because in many families of GLMMs,  $\sigma_\epsilon^2$  (observation-level  
91 variance) cannot be clearly separated into  $\sigma_e^2$  (overdispersion variance) and  $\sigma_d^2$  (distribution-  
92 specific variance). It turns out that binomial and Poisson distributions are special cases where  $\sigma_d^2$   
93 can be usefully calculated, because either all overdispersion is modelled by an OLRE (additive  
94 overdispersion) or by a single multiplicative overdispersion parameter (multiplicative  
95 overdispersion). This is not the case for other families. However, as we will show below, we can  
96 always obtain the GLMM version of  $\sigma_\epsilon^2$  (on the latent scale) directly. We refer to this generalised  
97 version of  $\sigma_\epsilon^2$  as ‘the observation-level variance’ here rather than the residual variance (but we keep  
98 the notation  $\sigma_\epsilon^2$ ). Note that the observation-level variance,  $\sigma_\epsilon^2$ , should not be confused with the  
99 variance associated with OLRE, which estimates  $\sigma_e^2$  and can be considered to be a part of  $\sigma_\epsilon^2$ .

### 100 **3. Extension of $R^2_{\text{GLMM}}$ and $\text{ICC}_{\text{GLMM}}$**

101 We now define  $R^2_{\text{GLMM}}$  and  $\text{ICC}_{\text{GLMM}}$  for a quasi-Poisson (may also be referred to as overdispersed-  
102 Poisson) GLMM, because the quasi-Poisson distribution is an extension of Poisson distribution [15,  
103 16], and is similar to the negative binomial distribution at least in their common applications [9, 17].  
104 Imagine count data repeatedly measured from a number of individuals with associated data on  $k$   
105 covariates. We fit a quasi-Poisson (QP) GLMM with the log link function (Model 2):

$$106 \quad y_{ij} \sim \text{QP}(\lambda_{ij}, \omega), \quad (3.1)$$

$$107 \quad \ln(\lambda_{ij}) = \beta_0 + \sum_{h=1}^k \beta_h x_{hij} + \alpha_i, \quad (3.2)$$

$$108 \quad \alpha_i \sim \text{Gaussian}(0, \sigma_\alpha^2), \quad (3.3)$$

109 where  $y_{ij}$  is the  $j$ th observation of the  $i$ th individual and  $y_{ij}$  follows a quasi-Poisson distribution with  
110 two parameters,  $\lambda_{ij}$  and  $\omega$  [15, 16],  $\ln(\lambda_{ij})$  is the latent value for the  $j$ th observation of the  $i$ th

111 individual,  $\omega$  is the overdispersion parameter (when the multiplicative dispersion parameter  $\omega$  is 1,  
 112 the model becomes a standard Poisson GLMM),  $\alpha_i$  is an individual-specific effect, assumed to be  
 113 normally distributed in the population with the mean and variance of 0 and  $\sigma_\alpha^2$ , respectively (as in  
 114 Model 1), and the other symbols are the same as above. Quasi-Poisson distributions have a mean of  
 115  $\lambda$  and a variance of  $\lambda\omega$  (Table 1). For such a model, we can define  $R^2_{\text{GLMM}(m)}$  and (adjusted)  
 116  $\text{ICC}_{\text{GLMM}}$  as:

$$117 \quad R^2_{\text{QP-ln}(m)} = \frac{\sigma_f^2}{\sigma_f^2 + \sigma_\alpha^2 + \ln(1 + \omega / \lambda)}, \quad (3.4)$$

$$118 \quad \text{ICC}_{\text{QP-ln}} = \frac{\sigma_\alpha^2}{\sigma_\alpha^2 + \ln(1 + \omega / \lambda)}, \quad (3.5)$$

119 where the subscript of  $R^2$  and ICC denote the distributional family, here QP-ln for quasi-Poisson  
 120 distribution with log link, the term  $\ln(1 + \omega / \lambda)$  corresponds to the observation-level variance  $\sigma_\epsilon^2$   
 121 (Table 1, for derivation see Appendix S1),  $\omega$  is the overdispersion parameter, and  $\lambda$  is the mean  
 122 value of  $\lambda_{ij}$ . We discuss how to obtain  $\lambda$  below (Section 5).

123 The calculation is very similar for a negative binomial (NB) GLMM with the log link (Model 3):

$$124 \quad y_{ij} \sim \text{NB}(\lambda_{ij}, \theta), \quad (3.6)$$

$$125 \quad \ln(\lambda_{ij}) = \beta_0 + \sum_{h=1}^k \beta_h x_{hij} + \alpha_i, \quad (3.7)$$

$$126 \quad \alpha_i \sim \text{Gaussian}(0, \sigma_\alpha^2), \quad (3.8)$$

127 where  $y_{ij}$  is the  $j$ th observation of the  $i$ th individual and  $y_{ij}$  follows a negative binomial distribution  
 128 with two parameters,  $\lambda_{ij}$  and  $\theta$ , where  $\theta$  is the shape parameter of the negative binomial distribution  
 129 (given by the software often as the dispersion parameter), and the other symbols are the same as  
 130 above. The parameter  $\theta$  is sometimes referred to as ‘size’. Negative binomial distributions have a  
 131 mean of  $\lambda$  and a variance of  $\lambda + \lambda^2/\theta$  (Table 1).  $R^2_{\text{GLMM}(m)}$  and (adjusted)  $\text{ICC}_{\text{GLMM}}$  for this model  
 132 can be calculated as:

$$133 \quad R_{\text{NB-ln}(m)}^2 = \frac{\sigma_f^2}{\sigma_f^2 + \sigma_\alpha^2 + \ln(1 + 1/\lambda + 1/\theta)}, \quad (3.9)$$

$$134 \quad \text{ICC}_{\text{NB-ln}} = \frac{\sigma_\alpha^2}{\sigma_\alpha^2 + \ln(1 + 1/\lambda + 1/\theta)}, \quad (3.10)$$

135 Finally, for a gamma GLMM with the log link (Model 4):

$$136 \quad y_{ij} \sim \text{gamma}(\lambda_{ij}, \nu), \quad (3.11)$$

$$137 \quad \ln(\lambda_{ij}) = \beta_0 + \sum_{h=1}^k \beta_h x_{hij} + \alpha_i, \quad (3.12)$$

$$138 \quad \alpha_i \sim \text{Gaussian}(0, \sigma_\alpha^2), \quad (3.13)$$

139 where  $y_{ij}$  is the  $j$ th observation of the  $i$ th individual and  $y_{ij}$  follows a gamma distribution with two  
 140 parameters,  $\lambda_{ij}$  and  $\nu$ , where  $\nu$  is the shape parameter of the gamma distribution (sometimes  
 141 statistical programs report  $1/\nu$  instead of  $\nu$ ; also note that the gamma distribution can be  
 142 parameterized in alternative ways, Table 1). Gamma distributions have a mean of  $\lambda$  and a variance  
 143 of  $\lambda^2/\nu$  (Table 1).  $R_{\text{GLMM}(m)}^2$  and (adjusted)  $\text{ICC}_{\text{GLMM}}$  can be calculated as:

$$144 \quad R_{\text{gamma-ln}(m)}^2 = \frac{\sigma_f^2}{\sigma_f^2 + \sigma_\alpha^2 + \ln(1 + 1/\nu)}, \quad (3.15)$$

$$145 \quad \text{ICC}_{\text{gamma-ln}} = \frac{\sigma_\alpha^2}{\sigma_\alpha^2 + \ln(1 + 1/\nu)}, \quad (3.16)$$

#### 146 **4. Obtaining the observation-level variance by the ‘first’ delta method**

147 For overdispersed Poisson, negative binomial and gamma GLMMs with log link, the observation-  
 148 level variance  $\sigma_\epsilon^2$  can be obtained via the variance of the log-normal distribution (Appendix S1).  
 149 This is the approach that has led to the terms presented above. There are two more alternative  
 150 methods to obtain the same target: the delta method and the trigamma function. The two  
 151 alternatives have different advantages and we will therefore discuss them in some detail in the  
 152 following.



153 The delta method for variance approximation uses a first order Taylor series expansion, which is  
154 often employed to approximate the standard error (error variance) for transformations (or functions)  
155 of a variable  $x$  when the (error) variance of  $x$  itself is known (see [18]; for an accessible reference  
156 for biologists, [19]). The delta method for variance approximation can be written as:

$$157 \quad \text{var}[f(x)] \approx \text{var}[x] \left( \frac{d}{dx} f(x) \right)^2, \quad (4.1)$$

158 where  $x$  is a random variable (typically represented by observations),  $f$  represents a function (e.g.  
159 log or square-root),  $\text{var}$  denotes variance, and  $d/dx$  is a (first) derivative with respect to variable  $x$ .  
160 Taking derivatives of any function can be easily done using the R environment (examples can be  
161 found in the Appendices). It is the delta method that Foulley and colleagues [20] used to derive the  
162 distribution-specific variance  $\sigma_d^2$  for Poisson GLMMs as  $1/\lambda$  (see also [21]). Given that  $\text{var}[y] = \lambda$   
163 in the case of Poisson distributions and  $d \ln(\lambda) / dx = 1/\lambda$ , it follows that

164  $\text{var}[\ln(y)] \approx \lambda(1/\lambda)^2 = 1/\lambda$  (note that for Poisson distributions without overdispersion,  $\sigma_d^2$  is equal  
165 to  $\sigma_\epsilon^2$  because  $\sigma_\epsilon^2 = 0$ ).

166 One clear advantage of the delta method is its flexibility. We can easily obtain the observation-level  
167 variance  $\sigma_\epsilon^2$  for all kinds of distributions/link functions. For example, by using the delta method, it  
168 is straightforward to obtain  $\sigma_\epsilon^2$  for the Tweedie distribution, which has been used to model non-  
169 negative real numbers in ecology (e.g., [22, 23]). For the Tweedie distribution, the variance on the  
170 observed scale has the relationship  $\text{var}[y] = \varphi \mu^p$  where  $\mu$  is the mean on the observed scale and  $\varphi$  is  
171 the dispersion parameter, comparable to  $\lambda$  and  $\omega$  in equation (3.1), and  $p$  is a positive constant  
172 called an index parameter. Therefore, when used with the log-link function,  $\sigma_\epsilon^2$  can be  
173 approximated by  $\varphi \mu^{(p-2)}$  according to equation (4.1). The log-normal approximation  $\ln(1 + \varphi \mu^{(p-2)})$   
174 is also possible (see Appendix S1; Table 1).

175 The use of the trigamma function  $\psi_1$  is limited to distributions with log link, but it is considered to  
176 provide the most accurate estimate of the observation level variance  $\sigma_\epsilon^2$  in those cases. This is  
177 because the variance of a gamma-distributed variable on the log scale is equal to  $\psi_1(\nu)$  where  $\nu$  is  
178 the shape parameter of the gamma distribution [24] and hence  $\sigma_\epsilon^2$  is  $\psi_1(\nu)$ . At the level of the  
179 statistical parameters (Table 1; on the ‘expected data’ scale; *sensu* [25]; see their Figure 1), Poisson  
180 and negative binomial distributions can both be seen as special cases of gamma distributions, and  
181  $\sigma_\epsilon^2$  can be obtained using the trigamma function (Table 1). For example,  $\sigma_\epsilon^2$  for the Poisson  
182 distribution is  $\psi_1(\lambda)$  with the speciality that in the case of Poisson distributions  $\sigma_\epsilon^2 = \sigma_d^2$ . As we  
183 show in Appendix S2,  $\ln(1+1/\lambda)$  (log-normal approximation),  $1/\lambda$  (delta method approximation) and  
184  $\psi_1(\lambda)$  (trigamma function) give similar results when  $\lambda$  is greater than 2. Our recommendation is to  
185 use the trigamma function for obtaining  $\sigma_\epsilon^2$  whenever this is possible.

186 The trigamma function has been previously used to obtain observation-level variance in  
187 calculations of heritability (which can be seen as a type of ICC although in a strict sense, it is not;  
188 see [25]) using negative binomial GLMMs ([24, 26]; cf. [25]). Table 1 summarises observation-  
189 level variance  $\sigma_\epsilon^2$  for overdispersed Poisson, negative binomial and gamma distributions for  
190 commonly used link functions.

## 191 **5. How to estimate $\lambda$ from data**

192 For some calculations, we require an estimate of the global expected value  $\lambda$ . Imagine a Poisson  
193 GLMM with log link and additive overdispersion fitted as an observation-level random effect  
194 (Model 5):

$$195 \quad y_{ij} \sim \text{Poisson}(\lambda_{ij}), \quad (5.1)$$

$$196 \quad \ln(\lambda_{ij}) = \beta_0 + \sum_{h=1}^p \beta_h x_{hij} + \alpha_i + e_{ij}, \quad (5.2)$$

197  $\alpha_i \sim \text{Gaussian}(0, \sigma_\alpha^2),$  (5.3)

198  $e_{ij} \sim \text{Gaussian}(0, \sigma_e^2),$  (5.4)

199 where  $y_{ij}$  is the  $j$ th observation of the  $i$ th individual, and follows a Poisson distribution with the  
 200 parameter  $\lambda_{ij}$ ,  $e_{ij}$  is an additive overdispersion term for  $j$ th observation of the  $i$ th individual, and the  
 201 other symbols are the same as above. Poisson distributions have a mean of  $\lambda$  and a variance of  $\lambda$  (cf.  
 202 Table 1). Using the log-normal approximation  $R^2_{\text{GLMM}(m)}$  and (adjusted)  $\text{ICC}_{\text{GLMM}}$  can be calculated  
 203 as:

204 
$$R^2_{\text{P-ln}(m)} = \frac{\sigma_f^2}{\sigma_f^2 + \sigma_\alpha^2 + \sigma_e^2 + \ln(1 + 1/\lambda)},$$
 (5.5)

205 
$$\text{ICC}_{\text{P-ln}} = \frac{\sigma_\alpha^2}{\sigma_\alpha^2 + \sigma_e^2 + \ln(1 + 1/\lambda)},$$
 (5.6)

206 where, as mentioned above, the term  $\ln(1+1/\lambda)$  is  $\sigma_e^2$  (or  $\sigma_d^2$ ) for Poisson distributions with the log  
 207 link (Table 1).

208 In our earlier papers, we proposed to use the exponential of the intercept,  $\exp(\beta_0)$  (from the  
 209 intercept-only model) as an estimator of  $\lambda$  [2, 3]; note that  $\exp(\beta_0)$  from models with any fixed  
 210 effects will often be different from  $\exp(\beta_0)$  from the intercept-only model. We also suggested that it  
 211 is possible to use the mean of observed values  $y_{ij}$ . Unfortunately, these two recommendations are  
 212 often inconsistent with each other. This is because, given Model 5 (and all the models in the  
 213 previous section), the following relationships hold:

214  $\exp(\beta_0) \leq E[y_{ij}],$  (5.7)

215  $E[\lambda_{ij}] = \exp(\beta_0 + 0.5\sigma_\tau^2),$  (5.8)

216  $E[y_{ij}] = E[\lambda_{ij}],$  (5.9)

217 where E represents the expected value (i.e., mean) on the observed scale,  $\beta_0$  is the mean value on  
 218 the latent scale (i.e.  $\beta_0$  from the intercept-only model),  $\sigma_\tau^2$  is the total variance on the latent scale

219 (e.g.,  $\sigma_\alpha^2 + \sigma_e^2$  in Models 1 and 5, and  $\sigma_\alpha^2$  in Models 2-4 [2]; see also [27]). In fact,  $\exp(\beta_0)$  gives  
220 the median value of  $y_{ij}$  rather than the mean of  $y_{ij}$ , assuming a Poisson distribution. Thus, the use of  
221  $\exp(\beta_0)$  will often overestimate  $\sigma_d^2$ , providing smaller estimates of  $R^2$  and ICC, compared to when  
222 using averaged  $y_{ij}$  (which is usually a better estimate of  $E[y_{ij}]$ ). Quantitative differences between the  
223 two approaches may often be negligible, but when  $\lambda$  is small, the difference can be substantial so  
224 the choice of the method needs to be reported for reproducibility (Appendix S2). Our new  
225 recommendation is to obtain  $\lambda$  via equation (5.8), which is the Poisson parameter averaged across  
226 cluster-level parameters ( $\lambda_i$  for each individual in our example; [[17, 20, 28]]). Thus, obtaining  $\lambda$  via  
227 equation (5.8) will be more accurate than estimating  $\lambda$  by calculating the average of observed  
228 values although these two methods will give very similar or identical values when sampling is  
229 balanced (i.e., observations are equally distributed across individuals and covariates). This  
230 recommendation for obtaining  $\lambda$  also applies to negative binomial GLMMs (see Table 1).

## 231 **6. Jensen's inequality and the 'second' delta method**

232 A general form of equation (5.7) is known as Jensen's inequality,  $g(\bar{x}) \leq \overline{g(x)}$  where  $g$  is a convex  
233 function. Hence, the transformation of the mean value is equal to or larger than the mean of  
234 transformed values (the opposite is true for a concave function; that is,  $g(\bar{x}) \geq \overline{g(x)}$ ; [29]). In fact,  
235 whenever the function is not strictly linear, simple application of the inverse link function (or back-  
236 transformation) cannot be used to translate the mean on the latent scale into the mean value on the  
237 observed scale. This inequality has important implications for the interpretation of results from  
238 GLMMs, and also generalized linear models GLMs and linear models with transformed response  
239 variables.

240 Although log-link GLMMs (e.g., Model 5) have an analytical solution, equation (5.8), this is not  
241 usually the case. Therefore, converting the latent scale values into observation-scale values requires  
242 simulation using the inverse link function. However, the delta method for bias correction can be

243 used as a general approximation to account for Jensen's inequality when using link functions or  
244 transformations. This application of the delta method uses a second order Taylor series expansion  
245 [18, 30]. A simple case of the delta method for bias correction can be written as:

$$246 \quad E[f(x)] \approx f(x) + 0.5\sigma_\tau^2 \frac{d^2}{dx^2} f(x), \quad (6.1)$$

247 where  $d^2/dx^2$  is a second derivative with respect to the variable  $x$  and the other symbols are as in  
248 equations (4.1) and (5.8). By employing this bias correction delta method (with  
249  $d^2 \exp(x) / dx^2 = \exp(x)$ ), we can approximate equation (5.8) using the same symbols as in  
250 equations (5.7)-(5.9):

$$251 \quad E[\lambda_{ij}] = E[\exp(\beta_0)] \approx \exp(\beta_0) + 0.5\sigma_\tau^2 \exp(\beta_0) \quad (6.2)$$

252 The comparison between equation (5.8) (exact) and equation (6.2) (approximate) is shown in  
253 Appendix S3. The approximation is most useful when the exact formula is not available as in the  
254 case of a binomial GLMM with logit link (Model 6):

$$255 \quad y_{ij} \sim \text{binomial}(n_{ij}, p_{ij}), \quad (6.3)$$

$$256 \quad \text{logit}(p_{ij}) = \beta_0 + \sum_{h=1}^k \beta_h x_{hij} + \alpha_i + e_{ij}, \quad (6.4)$$

$$257 \quad \alpha_i \sim \text{Gaussian}(0, \sigma_\alpha^2), \quad (6.5)$$

$$258 \quad e_{ij} \sim \text{Gaussian}(0, \sigma_e^2), \quad (6.6)$$

259 where  $y_{ij}$  is the number of 'success' in  $n_{ij}$  trials by the  $i$ th individual at the  $j$ th occasion (for binary  
260 data,  $n_{ij}$  is always 1),  $p_{ij}$  is the underlying probability of success, and the other symbols are the same  
261 as above. Binomial distributions have a mean of  $p$  and a variance of  $np(1-p)$ ; (Table 2).

262 To obtain corresponding values between the latent scale and data (observation) scale, we need to  
263 account for Jensen's inequality. The logit function used in binomial GLMMs combines of concave

264 and convex sections, which the delta method deals with efficiently. The overall intercept,  $\beta_0$  on the  
 265 latent scale could therefore be transformed not with the inverse (anti) logit function  
 266 ( $\text{logit}^{-1}(x) = \exp(x)/(1 + \exp(x))$ ), but with the bias-corrected delta method approximation. Given  
 267 that  $d^2 \text{logit}^{-1}(x)/dx^2 = \exp(x)(1 - \exp(x))/(1 + \exp(x))^3$  in the case of the binomial GLMM with the  
 268 logit-link function, the approximation can be written as:

$$269 \quad E[y_{ij}] = E[\text{logit}^{-1}(\beta_0)] \approx \frac{\exp(\beta_0)}{1 + \exp(\beta_0)} + 0.5\sigma_\tau^2 \frac{\exp(\beta_0)(1 - \exp(\beta_0))}{(1 + \exp(\beta_0))^3}. \quad (6.7)$$

270 We can replace  $\beta_0$  with any value obtained from the fixed part of the model (i.e.  $\beta_0 + \sum \beta_h x_{hij}$ ).  
 271 McCulloch and colleagues [31] provide another approximation formula, which, by using our  
 272 notation, can be written as:

$$273 \quad E[y_{ij}] \approx \text{logit}^{-1} \left( \beta_0 - 0.5\sigma_\tau^2 \tanh \left( \frac{\beta_0 (1 + 2 \exp(-0.5\sigma_\tau^2))}{6} \right) \right) \quad (6.8)$$

274 Yet, another approximation proposed by Zeger and colleagues [32] can be written as:

$$275 \quad E[y_{ij}] \approx \text{logit}^{-1} \left( \beta_0 \left[ \sqrt{1 + \left( \frac{16\sqrt{3}}{15\pi} \right)^2 \sigma_\tau^2} \right]^{-1} \right). \quad (6.9)$$

276 This approximation, equation (6.9), uses the exact solution for the inverse probit function, which  
 277 can be written for a model like Model 6 but using the probit link: i.e.,

$$278 \quad \text{probit}(p_{ij}) = \beta_0 + \sum_{h=1}^k \beta_h x_{hij} + \alpha_i + e_{ij} \quad \text{in place of equation (6.4):}$$

$$279 \quad E[y_{ij}] = \text{probit}^{-1} \left( \beta_0 \sqrt{1 + \sigma_\tau^2}^{-1} \right). \quad (6.10)$$

280 A comparison between equations (6.7), (6.8) and (6.9) is also shown in Appendix S3 (it turns out  
 281 equation (6.8) gives the best approximation). Simulation will give the most accurate conversions

282 when no exact solutions are available. The use of the delta method for bias correction accounting  
283 for Jensen's inequality is a very general and versatile approach that is applicable for any distribution  
284 with any link function (see Appendix S3) and can save computation time. We note that the accuracy  
285 of the delta method (both variance approximation and bias correction) depends on the form of the  
286 function  $f$ , the conditions for and limitation of the delta method are described in the article by  
287 Oehlert [30].

## 288 **7. Special considerations for binomial GLMMs**

289 The observation-level variance  $\sigma_{\epsilon}^2$  can be thought of as being added to the latent scale on which  
290 other variance components are also estimated in a GLMM (equations (3.2), (3.7), (3.12), (5.2) and  
291 (6.4) for Models 2-6). Since the proposed  $R^2_{\text{GLMM}}$  and  $\text{ICC}_{\text{GLMM}}$  are ratios between variance  
292 components and their sums, we can show using the delta method that  $R^2_{\text{GLMM}}$  and  $\text{ICC}_{\text{GLMM}}$   
293 calculated via  $\sigma_{\epsilon}^2$  approximate to those of  $R^2$  and ICC on the observation (original) scale (shown in  
294 Appendix S4). In some cases, there exist specific formulae for ICC on the observation scale [2]. In  
295 the past, we distinguished between ICC on the latent scale and on the observation scale [2]. Such a  
296 distinction turns out to be strictly appropriate only for binomial distributions but not for Poisson  
297 distributions (and probably also not for other non-Gaussian distributions). This is because the  
298 property of what we have called the distribution-specific variance  $\sigma_d^2$  for binomial distributions (e.g.  
299  $\pi^2/3$  for binomial error distribution with the logit link function) is quite different from what we have  
300 discussed as the observation-level variance  $\sigma_{\epsilon}^2$  although these two types of variance are related  
301 conceptually (i.e., both represents variance due to non-Gaussian distributions with specific link  
302 functions). Let us explain this further.

303 A binomial distribution with a mean of  $p$  (the proportion of successes) has a variance of  $p(1-p)/n$   
304 (the variance for the number of successes is  $np(1-p)$ ; see Table 2). We find that the observation-  
305 level variance is  $1/(np(1-p))$  using the delta method on the logit-link function (see Table 2). This

306 observation-level variance  $1/(np(1-p))$ , or  $1/(p(1-p))$  for binary data, is clearly different from the  
307 distribution-specific variance  $\pi^2/3$ . As with the observation-level variance for the log-Poisson model  
308 (which is  $1/\lambda$  and changes with  $\lambda$ ; note that we would have called  $1/\lambda$  the distribution-specific  
309 variance; [2, 3]), the observation-level variance of the binomial distribution changes as  $p$  changes  
310 (see Appendix S5), suggesting these two observation-level variances ( $1/\lambda$  and  $1/(np(1-p))$ ) are  
311 analogous while the distribution-specific variance  $\pi^2/3$  is not. Further, the minimum value of  
312  $1/(p(1-p))$  is 4, which is larger than  $\pi^2/3 \approx 3.29$ , meaning that the use of  $1/p(1-p)$  in  $R^2$  and ICC for  
313 binary data will always produce larger values than those using  $\pi^2/3$ . Consequently, Browne and  
314 colleagues [14] showed that ICC values (or variance partition coefficients, VPCs) estimated using  
315  $\pi^2/3$  were higher than corresponding ICC values on the observation (original) scale using logistic-  
316 binomial GLMMs (see also [33]). Note that they only considered binary data, i.e.,  $1/(np(1-p))$   
317 where  $n = 1$ , because all proportion data can be rearranged as binary responses with a  
318 grouping/clustering factor.

319 Then, what is  $\pi^2/3$ ? Three common link functions in binomial GLMMs (logit, probit and  
320 complementary log-log) all have corresponding distributions on the latent scale: the logistic  
321 distribution, standard normal distribution and Gumbel distribution, respectively. Each of these  
322 distributions has a theoretical variance, namely,  $\pi^2/3$ , 1 and  $\pi^2/6$ , respectively, which we previous  
323 referred to as distribution-specific variances [2, 3] (Table 2). As far as we are aware, these  
324 theoretical variances only exist for binomial distributions. The meaning of  $1/(np(1-p))$ , which is the  
325 variance on the latent scale that approximates to the variance due to binomial distributions on the  
326 observation scale is distinct from the meaning of  $\pi^2/3$ , which is the variance of the latent  
327 distribution (i.e., the logistic distribution with the scale parameter being 1). The use of the  
328 theoretical variance will almost always provide different values of  $R^2_{\text{GLMM}}$  and  $\text{ICC}_{\text{GLMM}}$  from  
329 those using the observation-level obtained via the delta method (see Appendix S5). This is because  
330 the use of  $\pi^2/3$  implicitly assumes all data sets have the same observation-level variance regardless  
331 of mean ( $p$ ) given the same number of trials ( $n$ ). Therefore, we need distinguishing these theoretical



332 variances from the observation-level variance.  $R^2$  and ICC values using the theoretical distribution-  
333 specific variance might be rightly called the latent (link) scale (*sensu* [2]) whereas, as mentioned  
334 above,  $R^2$  and ICC values using the observation-level variance estimate the counterparts on the  
335 observation (original) scale (cf. [25]).

## 336 **8. Worked examples: revisiting the beetles**

337 In the following, we present a worked example by expanding the beetle dataset that was generated  
338 for previous work [3]. In brief, the dataset represents a hypothetical species of beetle that has the  
339 following life cycle: larvae hatch and grow in the soil until they pupate, and then adult beetles feed  
340 and mate on plants. Larvae are sampled from 12 different populations ('Population'; see Figure 1).  
341 Within each population, larvae are collected at two different microhabitats ('Habitat'): dry and wet  
342 areas as determined by soil moisture. Larvae are exposed to two different dietary treatments  
343 ('Treatment'): nutrient rich and control. The species is sexually dimorphic and can be easily sexed  
344 at the pupa stage ('Sex'). Male beetles have two different color morphs: one dark and the other  
345 reddish brown ('Morph', labeled as A and B in Figure 1). Sexed pupae are housed in standard  
346 containers until they mature ('Container'). Each container holds eight same-sex animals from a  
347 single population, but with a mix of individuals from the two habitats ( $N_{\text{container}} = 120$ ;  $N_{\text{animal}} =$   
348 960).

349 We have data on five phenotypes, two of them sex-limited: (i) the number of eggs laid by each  
350 female after random mating which we had generated previously using Poisson distributions (with  
351 additive dispersion) and we revisit here for analysis with quasi-Poisson models (i.e. multiplicative  
352 dispersion), (ii) the incidence of endo-parasitic infections that we generated as being negative  
353 binomial distributed, (iii) body length of adult beetles which we had generated previously using  
354 Gaussian distributions and that we revisit here for analysis with gamma distributions, (iv) time to  
355 visit five predefined sectors of an arena (employed as a measure of exploratory tendencies) that we  
356 generated as being gamma distributed, and (v) the two male morphs, which was again generated

357 with binomial distributions (for the details of parameter settings, see Table 3). We will use this  
358 simulated dataset to estimate  $R^2_{\text{GLMM}}$  and  $\text{ICC}_{\text{GLMM}}$ .

359 All data generation and analyses were conducted in R 3.3.1 [10]. We used functions to fit GLMMs  
360 from the three R packages: 1) the *glmmadmb* function from glmmADMB [34], 2) the *glmmPQL*  
361 function from MASS [35], and 3) the *glmer* and *glmer.nb* functions from lme4 [36]. In Table 4, we  
362 only report results from *glmmadmb* because this is the only function that can fit models with all  
363 relevant distributional families. All scripts and results are provided as an electronic supplement  
364 (Appendix S6). In addition, Appendix S6 includes an example of a model using the Tweedie  
365 distribution, which was fitted by the *cpGLMM* function from the cplm package [23]. Notably, our  
366 approach for  $R^2_{\text{GLMM}}$  is kindly being implemented in the *rsquared* function in the R package  
367 piecewiseSEM [37]. Another important note is that we often find less congruence in GLMM results  
368 from the different packages than those of linear mixed-effects models, LMM. For example, GLMM  
369 using the gamma error structure with the log-link function (Size and Exploration models),  
370 *glmmadmb* and *glmmPQL* produced very similar results, while *glmer* gave larger  $R^2$  and ICC values  
371 than the former two functions (for more details, see Appendix S6; also see [38]). Thus, it is  
372 recommended to run GLMMs in more than one package to check robustness of the results although  
373 this may not always be possible.

374 In all the models, estimated regression coefficients and variance components are very much in  
375 agreement with what is expected from our parameter settings (compare Table 3 with Table 4; see  
376 also Appendix S6). When comparing the null and full models, which had ‘sex’ as a predictor, the  
377 magnitudes of the variance component for the container effect always decrease in the full models.  
378 This is because the variance due to sex is confounded with the container variance in the null model.  
379 As expected, (unadjusted) ICC values from the null models are usually smaller than adjusted ICC  
380 values from the full models because the observation-level variance (analogous to the residual  
381 variance) was smaller in the full models, implying that the denominator of, for example, equation  
382 (3.5) shrinks. However, the numerator also becomes smaller for ICC values for the container effect

383 from the parasite, size and exploration models so that adjusted ICC values are not necessarily larger  
384 than unadjusted ICC values. Accordingly, adjusted  $ICC_{\text{[container]}}$  is smaller in the parasite and size  
385 models but not in the exploration model. The last thing to note is that for the morph models  
386 (binomial mixed models), both  $R^2$  and ICC values are larger when using the distribution-specific  
387 variance rather than the observation-level variance, as discussed above (Table 4; see also Appendix  
388 S4).

## 389 **9. Alternatives and a cautionary note**

390 Here we extend our simple methods for obtaining  $R^2_{\text{GLMM}}$  and  $ICC_{\text{GLMM}}$  for Poisson and binomial  
391 GLMMs to other types of GLMMs such as negative binomial and gamma. We describe three  
392 different ways of obtaining the observational-level variance and how to obtain the key rate  
393 parameter  $\lambda$  for Poisson and negative binomial distributions. We discuss important considerations  
394 which arise for estimating  $R^2_{\text{GLMM}}$  and  $ICC_{\text{GLMM}}$  with binomial GLMMs. As we have shown, the  
395 merit of our approach is not only its ease of implementation but also that our approach encourages  
396 researchers to pay more attention to variance components at different levels. Research papers in the  
397 field of ecology and evolution often report only regression coefficients but not variance components  
398 of GLMMs [3].

399 We would like to highlight two recent studies that provide alternatives to our approach. First, Jaeger  
400 and colleagues [5] have proposed  $R^2$  for fixed effects in GLMMs, which they referred to as  $R^2_{\beta^*}$  (an  
401 extension of an  $R^2$  for fixed effects in linear mixed models or  $R^2_{\beta}$  by Edwards and colleagues [39]).  
402 They show that  $R^2_{\beta^*}$  is a general form of our marginal  $R^2_{\text{GLMM}}$ ; in theory,  $R^2_{\beta^*}$  can be used for any  
403 distribution (error structure) with any link function. Jaeger and colleagues highlight that in the  
404 framework of  $R^2_{\beta^*}$ , they can easily obtain semi-partial  $R^2$ , which quantifies the relative importance  
405 of each predictor (fixed effect). As they demonstrate by simulation, their method potentially gives a  
406 very reliable tool for model selection. One current issue for this approach is that implementation  
407 does not seem as simple as our approach (see also [40]). We note that our  $R^2_{\text{GLMM}}$  framework could

408 also provide semi-partial  $R^2$  via commonality analysis (see [41]), since unique variance for each  
409 predictor in commonality analysis corresponds to semi-partial  $R^2$ ; [42].

410 Second, de Villemereuil and colleagues [25] have provided a framework with which one can  
411 estimate exact heritability using GLMMs at different scales (e.g. data and latent scales). Their  
412 method can be extended to obtain exact ICC values on the data (observation) scale, which is  
413 analogous to, but not the same as, our  $ICC_{GLMM}$  using the observation-level variance,  $\sigma_\epsilon^2$  described  
414 above. Further, this method can, in theory, be extended to estimate  $R^2_{GLMM}$  on the data  
415 (observation) scale. One potential difficulty is that the method of de Villemereuil and colleagues is  
416 exact but that a numerical method is used to solve relevant equations so one will require a software  
417 package (e.g., the QGglmm package; [25]). Relevantly, they have shown that heritability on the  
418 latent scale does not need  $\sigma_d^2$  (distribution-specific) but only need  $\sigma_\epsilon^2$  (overdispersion variance),  
419 which has interesting consequences in relation to our  $R^2_{GLMM}$  and  $ICC_{GLMM}$  (we briefly describes  
420 this possibility in Appendix S7; see also [40]).

421 Finally, we finish by repeating what we said at the end of our original  $R^2$  paper [3]. Both  $R^2$  and  
422 ICC are indices that are likely to reflect only one or a few aspects of a model fit to the data and  
423 should not be used for gauging the quality of a model. We encourage biologists use  $R^2$  and ICC in  
424 conjunctions with other indices like information criteria (e.g. AIC, BIC and DIC), and more  
425 importantly, with model diagnostics such as checking for model assumptions, heteroscedasticity  
426 and sensitivity to outliers.

## 427 **Authors' contributions**

428 SN conceived ideas, and conducted analysis with discussions with HS. All developed the ideas  
429 further, and contributed to writing and editing of the manuscript.

430 **Competing interests**

431 We have no competing interests.

432 **Funding**

433 SN was supported by an Australian Research Council Future Fellowship (FT130100268). HS was  
434 supported by an Emmy Noether fellowship from the German Research Foundation (DFG; SCHI  
435 1188/1-1).

436 **Acknowledgements**

437 We thank Losia Lagisz for help in making Figure 1. This work has been benefited from discussion  
438 with Jarrod Hadfield, Pierre de Villemereuil, Alistair Senior, Joel Pick and Dan Noble. We would  
439 also like to thanks an anonymous reviewer, whose comments have improved our manuscript.

440

441

## 442 **References**

- 443 [1] Lessells, C.M. & Boag, P.T. 1987 Unrepeatable repeatabilities - a common mistake. *Auk* **104**,  
444 116-121.
- 445 [2] Nakagawa, S. & Schielzeth, H. 2010 Repeatability for Gaussian and non-Gaussian data: a  
446 practical guide for biologists. *Biol Rev* **85**, 935-956. (doi:10.1111/j.1469-185X.2010.00141.x).
- 447 [3] Nakagawa, S. & Schielzeth, H. 2013 A general and simple method for obtaining  $R^2$  from  
448 generalized linear mixed-effects models. *Methods Ecol Evol* **4**, 133-142. (doi:10.1111/j.2041-  
449 210x.2012.00261.x).
- 450 [4] Johnson, P.C.D. 2014 Extension of Nakagawa & Schielzeth's  $R^2_{\text{GLMM}}$  to random slopes models.  
451 *Methods Ecol Evol* **5**, 944-946. (doi:10.1111/2041-210x.12225).
- 452 [5] Jaeger, B.C., Edwards, L.J., Das, K. & Sen, P.K. 2017 An  $R^2$  statistic for fixed effects in the  
453 generalized linear mixed model. *Journal of Applied Statistics* **44**, 1086-1105.  
454 (doi:10.1080/02664763.2016.1193725).
- 455 [6] LaHuis, D.M., Hartman, M.J., Hakoyama, S. & Clark, P.C. 2014 Explained variance measures  
456 for multilevel models. *Organ Res Methods* **17**, 433-451. (doi:10.1177/1094428114541701).
- 457 [7] Bolker, B.M., Brooks, M.E., Clark, C.J., Geange, S.W., Poulsen, J.R., Stevens, M.H.H. &  
458 White, J.S.S. 2009 Generalized linear mixed models: a practical guide for ecology and evolution.  
459 *Trends Ecol Evol* **24**, 127-135. (doi: 10.1016/J.Tree.2008.10.008).
- 460 [8] Bolker, B.M. 2008 *Ecological models and data in R*. Princeton, NJ, Princeton University Press.
- 461 [9] Ver Hoef, J.M. & Boveng, P.L. 2007 Quasi-Poisson vs. negative binomial regression: how  
462 should we model overdispersed count data? *Ecology* **88**, 2766-2772.
- 463 [10] R Development Core Team. 2016 R: A language and environment for statistical computing.  
464 (version 2.15.0 ed. Vienna, Austria, R Foundation for Statistical Computing).

- 465 [11] Snijders, T. & Bosker, R. 2011 *Multilevel Analysis: an Introduction to basic and advanced*  
466 *multilevel modeling*. 2nd ed. London, Sage.
- 467 [12] Harrison, X.A. 2014 Using observation-level random effects to model overdispersion in count  
468 data in ecology and evolution. *Peerj* **2**, e616. (doi:ARTN e61610.7717/peerj.616).
- 469 [13] Harrison, X.A. 2015 A comparison of observation-level random effect and Beta-Binomial  
470 models for modelling overdispersion in Binomial data in ecology & evolution. *Peerj* **3**, e1114.  
471 (doi:ARTN e111410.7717/peerj.1114).
- 472 [14] Browne, W.J., Subramanian, S.V., Jones, K. & Goldstein, H. 2005 Variance partitioning in  
473 multilevel logistic models that exhibit overdispersion. *J R Stat Soc a Stat* **168**, 599-613.
- 474 [15] Efron, B. 1986 Double Exponential-Families and Their Use in Generalized Linear-Regression.  
475 *J Am Stat Assoc* **81**, 709-721. (doi:10.2307/2289002).
- 476 [16] Gelfand, A.E. & Dalal, S.R. 1990 A note on overdispersed exponential-families. *Biometrika*  
477 **77**, 55-64. (doi:10.2307/2336049).
- 478 [17] Gelman, A. & Hill, J. 2006 *Data analysis using regression and multilevel/hierarchical models*  
479 Cambridge, Cambridge University Press.
- 480 [18] Ver Hoef, J.M. 2012 Who Invented the Delta Method? *Am Stat* **66**, 124-127.  
481 (doi:10.1080/00031305.2012.687494).
- 482 [19] Powell, L.A. 2007 Approximating variance of demographic parameters using the delta method:  
483 A reference for avian biologists. *Condor* **109**, 949-954. (doi: 10.1650/0010-  
484 5422(2007)109[949:Avodpu]2.0.Co;2).
- 485 [20] Foulley, J.L., Gianola, D. & Im, S. 1987 Genetic Evaluation of Traits Distributed as Poisson-  
486 Binomial with Reference to Reproductive Characters. *Theor. Appl. Genet.* **73**, 870-877. (doi:  
487 10.1007/Bf00289392).
- 488 [21] Gray, B.R. & Burlew, M.M. 2007 Estimating trend precision and power to detect trends across  
489 grouped count data. *Ecology* **88**, 2364-2372.

- 490 [22] Foster, S.D. & Bravington, M.V. 2013 A Poisson-Gamma model for analysis of ecological  
491 non-negative continuous data. *Environ Ecol Stat* **20**, 533-552. (doi:10.1007/s10651-012-0233-0).
- 492 [23] Zhang, Y.W. 2013 Likelihood-based and Bayesian methods for Tweedie compound Poisson  
493 linear mixed models. *Stat Comput* **23**, 743-757. (doi:10.1007/s11222-012-9343-7).
- 494 [24] Tempelman, R.J. & Gianola, D. 1999 Genetic analysis of fertility in dairy cattle using negative  
495 binomial mixed models. *J Dairy Sci* **82**, 1834-1847.
- 496 [25] de Villemereuil, P., Schielzeth, H., Nakagawa, S. & Morrissey, M. 2016 General Methods for  
497 Evolutionary Quantitative Genetic Inference from Generalized Mixed Models. *Genetics* **204**, 1281-  
498 1294. (doi:10.1534/genetics.115.186536).
- 499 [26] Matos, C.A.P., Thomas, D.L., Gianola, D., Tempelman, R.J. & Young, L.D. 1997 Genetic  
500 analysis of discrete reproductive traits in sheep using linear and nonlinear models .1. Estimation of  
501 genetic parameters. *J Anim Sci* **75**, 76-87.
- 502 [27] Carrasco, J.L. 2010 A generalized concordance correlation coefficient based on the variance  
503 components generalized linear mixed models for overdispersed count data. *Biometrics* **66**, 897-904.  
504 (doi: 10.1111/J.1541-0420.2009.01335.X).
- 505 [28] Foulley, J.L. & Im, S. 1993 A marginal quasi-likelihood approach to the analysis of Poisson  
506 variables with generalized linear mixed models. *Genet Sel Evol* **25**, 101-107. (doi:  
507 10.1051/gse:19930107).
- 508 [29] Rao, C.R. 2002 *Linear statistical inference and its applications*. 2nd ed. ed. New York, John  
509 Wiley & Sons.
- 510 [30] Oehlert, G.W. 1992 A note on the delta method. *Am Stat* **46**, 27-29. (doi: 10.2307/2684406).
- 511 [31] McCulloch, C.E., Searle, S.R. & Neuhaus, J.M. 2008 *Generalized, linear, and mixed models*.  
512 2nd ed. ed. Hoboken, N.J., Wiley ; Chichester : John Wiley [distributor].
- 513 [32] Zeger, S.L., Liang, K.Y. & Albert, P.S. 1988 Models for Longitudinal Data - a Generalized  
514 Estimating Equation Approach. *Biometrics* **44**, 1049-1060. (doi: 10.2307/2531734).



- 515 [33] Goldstein, H., Browne, W. & Rasbash, J. 2002 Partitioning variation in multilevel models.  
516 *Understand Stat* **1**, 223-231.
- 517 [34] Fournier, D.A., Skaug, H.J., Ancheta, J., Ianelli, J., Magnusson, A., Maunder, M.N., Nielsen,  
518 A. & Sibert, J. 2012 AD Model Builder: using automatic differentiation for statistical inference of  
519 highly parameterized complex nonlinear models. *Optim Method Softw* **27**, 233-249.  
520 (doi:10.1080/10556788.2011.597854).
- 521 [35] Venables, W.N. & Ripley, B.D. 2002 *Modern applied statistics with S*. 4 ed. New York,  
522 Springer.
- 523 [36] Bates, D., Machler, M., Bolker, B.M. & Walker, S.C. 2015 Fitting linear mixed-effects models  
524 using lme4. *J Stat Softw* **67**, 1-48.
- 525 [37] Lefcheck, J.S. 2016 PIECEWISESEM: Piecewise structural equation modelling in R for  
526 ecology, evolution, and systematics. *Methods Ecol Evol* **7**, 573-579. (doi:10.1111/2041-  
527 210x.12512).
- 528 [38] Brooks, M.E., Kristensen, K.K., van Benthem, K.J., Magnusson, A., Berg, C.W., Nielsen, A.,  
529 Skaug, H.J., Machler, M. & Bolker, B.M. 2017 Modeling zero-inflated count data with glmmTMB.  
530 *bioRxiv* (doi: [10.1101/132753](https://doi.org/10.1101/132753)).
- 531 [39] Edwards, L.J., Muller, K.E., Wolfinger, R.D., Qaqish, B.F. & Schabenberger, O. 2008 An  $R^2$   
532 statistic for fixed effects in the linear mixed model. *Stat Med* **27**, 6137-6157. (doi:  
533 10.1002/Sim.3429).
- 534 [40] Ives, A.R. 2017 R2s for correlated data: phylogenetic models, LMMs, and GLMMs. *bioRxiv*  
535 (doi: [10.1101/144170](https://doi.org/10.1101/144170)).
- 536 [41] Ray-Mukherjee, J., Nimon, K., Mukherjee, S., Morris, D.W., Slotow, R. & Hamer, M. 2014  
537 Using commonality analysis in multiple regressions: a tool to decompose regression effects in the  
538 face of multicollinearity. *Methods Ecol Evol* **5**, 320-328. (doi: 10.1111/2041-210x.12166).

539 [42] Nimon, K.F. & Oswald, F.L. 2013 Understanding the results of multiple linear regression:  
540 beyond standardized regression coefficients. *Organ Res Methods* **16**, 650-674.  
541 (doi:10.1177/1094428113493929).  
542

Table 1. The observation-level variance  $\sigma_\varepsilon^2$  for the three distributional families: quasi-Poisson, negative binomial and gamma with the three different methods for deriving  $\sigma_\varepsilon^2$ : the delta method, log-normal approximation and the trigamma function,  $\psi_1$ .

| Family                       | Distributional parameters     | Mean (E[y])<br>Variance (var[y])                     | Link function | Delta method                                  | Log-normal approximation                                   | Trigamma function                                                           |
|------------------------------|-------------------------------|------------------------------------------------------|---------------|-----------------------------------------------|------------------------------------------------------------|-----------------------------------------------------------------------------|
| Quasi-Poisson (QP)           | $OP(\lambda, \omega)$         | $E[y] = \lambda$                                     | log           | $\frac{\omega}{\lambda}$                      | $\ln\left(1 + \frac{\omega}{\lambda}\right)$               | $\psi_1\left(\frac{\lambda}{\omega}\right)$                                 |
| Poisson (when $\omega = 1$ ) | $\lambda > 0$<br>$\omega > 0$ | $\text{var}[y] = \lambda\omega$                      | square-root   | $0.25\omega$                                  | -                                                          |                                                                             |
| Negative binomial (NB)       | $NB(\lambda, \theta)$         | $E[y] = \lambda$                                     | log           | $\frac{1}{\lambda} + \frac{1}{\theta}$        | $\ln\left(1 + \frac{1}{\lambda} + \frac{1}{\theta}\right)$ | $\psi_1\left(\left[\frac{1}{\lambda} + \frac{1}{\theta}\right]^{-1}\right)$ |
|                              | $\lambda > 0$<br>$\theta > 0$ | $\text{var}[y] = \lambda + \frac{\lambda^2}{\theta}$ | square-root   | $0.25\left(1 + \frac{\lambda}{\theta}\right)$ | -                                                          |                                                                             |

|                                         |                             |                                         |                         |                          |                                     |               |
|-----------------------------------------|-----------------------------|-----------------------------------------|-------------------------|--------------------------|-------------------------------------|---------------|
| Gamma                                   | $\text{gmma}(\lambda, \nu)$ | $E[y] = \lambda$                        | log                     | $\frac{1}{\nu}$          | $\ln\left(1 + \frac{1}{\nu}\right)$ | $\psi_1(\nu)$ |
|                                         | $\lambda > 0$<br>$\nu > 0$  | $\text{var}[y] = \frac{\lambda^2}{\nu}$ | inverse<br>(reciprocal) | $\frac{1}{\nu\lambda^2}$ | -                                   |               |
| Gamma (alternative<br>parameterization) | $\text{gamma}(\nu, \kappa)$ | $E[y] = \frac{\nu}{\kappa}$             | log                     | $\frac{1}{\nu}$          | $\ln\left(1 + \frac{1}{\nu}\right)$ | $\psi_1(\nu)$ |
|                                         | $\nu > 0$<br>$\kappa > 0$   | $\text{var}[y] = \frac{\nu}{\kappa^2}$  | inverse<br>(reciprocal) | $\frac{\kappa^2}{\nu^3}$ | -                                   |               |

---

$\text{var}[\ln(x)] = \psi_1(\nu) = \sum_{n=1}^{\infty} 1/(\nu+n)$  when  $x$  follows gamma distribution. In the R environment, the function, *trigamma* can be used to obtain  $\psi_1(\nu)$ ; also note that  $\nu$  is known as a shape parameter while  $\kappa$  is as a rate parameter in gamma distribution.

Table 2. The distribution-specific (theoretical) variance  $\sigma_d^2$  and observation-level variance  $\sigma_\varepsilon^2$  using the delta method for binomial (and Bernoulli) distributions; note that only one of them should be used for obtaining  $R^2$  and ICC.

| Family                | Distributional parameters, mean & variance                                       | Link name                   | Link function                   | Theoretical (distribution-specific) variance                  | Observation-level variance (min. values and corresponding $p$ given $n = 1$ )                              |
|-----------------------|----------------------------------------------------------------------------------|-----------------------------|---------------------------------|---------------------------------------------------------------|------------------------------------------------------------------------------------------------------------|
| Binomial              | binomial( $n, p$ )                                                               |                             |                                 |                                                               |                                                                                                            |
| (Bernoulli; $n = 1$ ) | $0 < p < 1$<br><br>$n \geq 1$ (integers)                                         | logit                       | $\ln\left(\frac{p}{1-p}\right)$ | $\frac{\pi^2}{3} \approx 3.29$<br><br>(logistic distribution) | $\frac{1}{np(1-p)}$<br><br>(min = 4; $p = 0.5$ )                                                           |
|                       | $E[y] = np$<br><br>$\text{var}[y] = np(1-p)$<br><br>$\text{var}[y/n] = p(1-p)/n$ | probit<br><br>( $\Phi(p)$ ) | $\sqrt{2}\text{erf}^{-1}(2p-1)$ | 1<br><br>(standard normal distribution)                       | $2\pi n^{-1}p(1-p)\left(\exp\left[\text{erf}^{-1}(2p-1)^2\right]\right)^2$<br><br>(min ~ 1.57; $p = 0.5$ ) |

|                                                   |                                    |                                                                               |                                                                                                                                                                 |
|---------------------------------------------------|------------------------------------|-------------------------------------------------------------------------------|-----------------------------------------------------------------------------------------------------------------------------------------------------------------|
| <p>cloglog</p> <p>(complimentary<br/>log-log)</p> | <p><math>\ln(-\ln(1-p))</math></p> | <p><math>\frac{\pi^2}{6} \approx 1.65</math></p> <p>(Gumbel distribution)</p> | <p><math>\frac{p}{n(\ln(1-p))^2(1-p)}</math></p> <p>(min <math>\sim 1.54</math>; <math>p \sim 0.8</math>;<br/><math>\sim 2.08</math>; <math>p = 0.5</math>)</p> |
|---------------------------------------------------|------------------------------------|-------------------------------------------------------------------------------|-----------------------------------------------------------------------------------------------------------------------------------------------------------------|

---

'erf<sup>-1</sup>' is the inverse of the Gauss error function, which is often denoted as 'erf'.

Table 3. Parameter settings of regression coefficients ( $b$ ) and variance components ( $\sigma^2$ ) for five data sets: 1) fecundity, 2) endoparasite, 3) size, 4) exploration and 5) morph; all parameters are set on the latent scale apart from the size data (see below).

| Response                                                            | Intercept ( $b$ ) | Sex ( $b$ ) | Treatment ( $b$ ) | Habitat ( $b$ ) | Population ( $\sigma^2$ ) | Container ( $\sigma^2$ ) | Overdispersion ( $\sigma^2$ ) |
|---------------------------------------------------------------------|-------------------|-------------|-------------------|-----------------|---------------------------|--------------------------|-------------------------------|
| Fecundity: the number of eggs per female                            | 1.1               | -           | 0.5               | 0.1             | 0.4                       | 0.05                     | 0.1                           |
| Parasite: the number of endoparasites per individual                | 1.8               | -2          | -0.8              | 0.7             | 0.5                       | 0.8                      | -                             |
| Size: the body length of an individual*                             | 15                | -3          | 0.4               | 0.15            | 1.3                       | 0.3                      | 1.2                           |
| Exploration: the time taken visiting five sectors for an individual | 4                 | -1          | 2                 | -0.5            | 0.2                       | 0.2                      | -                             |
| Morph colour morph of a male                                        | -0.8              | -           | 0.8               | 0.5             | 1.2                       | 0.2                      | -                             |

\*Data for the six sets of models were simulated on the normal (Gaussian) scale but analysed assuming a gamma error structure with the log link so that estimations of these parameters will be on the log scale; note the overdispersion variance for this data is the residual variance.



Table 4. Mixed-effects model analysis of a simulated dataset estimating variance components and regression slopes for nutrient manipulations on fecundity, endoparasite loads, body length, exploration levels and male morph types;  $N_{[population]}=12$ ,  $N_{[container]}=120$  and  $N_{[animal]}=960$  ( $N_{[male]}= N_{[female]} = 480$ ).

| Model name                | Fecundity models (log-link) |                | Parasite models (log-link)     |                  | Size models (log-link) |                | Exploration models (log-link) |                | Morph models (logit-link)      |                  |
|---------------------------|-----------------------------|----------------|--------------------------------|------------------|------------------------|----------------|-------------------------------|----------------|--------------------------------|------------------|
|                           | Quasi-Poisson mixed models  |                | Negative binomial mixed models |                  | Gamma mixed models     |                | Gamma mixed models            |                | Binomial (binary) mixed models |                  |
|                           | Null Model                  | Full Model     | Null Model                     | Full Model       | Null Model             | Full Model     | Null Model                    | Full Model     | Null Model                     | Full Model       |
| <b>Fixed effects</b>      | <i>b</i>                    | <i>b</i>       | <i>b</i>                       | <i>b</i>         | <i>b</i>               | <i>b</i>       | <i>b</i>                      | <i>b</i>       | <i>b</i>                       | <i>b</i>         |
|                           | [95% CI]                    | [95% CI]       | [95% CI]                       | [95% CI]         | [95% CI]               | [95% CI]       | [95% CI]                      | [95% CI]       | [95% CI]                       | [95% CI]         |
| Intercept                 | 1.630                       | 1.261          | 0.766                          | 1.752            | 2.682                  | 2.737          | 4.752                         | 4.056          | -0.108                         | -0.740           |
|                           | [1.379, 1.882]              | [0.989, 1.532] | [0.330, 1.202]                 | [1.282, 2.223]   | [2.616, 2.689]         | [2.699, 2.775] | [4.555, 4.949]                | [3.842, 4.269] | [-0.718, 0.501]                | [-1.450, -0.030] |
| Treatment<br>(experiment) | -                           | 0.491          | -                              | -0.768           | -                      | 0.033          | -                             | 2.007          | -                              | 0.840            |
|                           |                             | [0.391, 0.591] |                                | [-0.870, -0.667] |                        | [0.023, 0.044] |                               | [1.965, 2.050] |                                | [0.422, 1.258]   |

|                         |            |                |            |                  |            |                  |            |                  |               |                |
|-------------------------|------------|----------------|------------|------------------|------------|------------------|------------|------------------|---------------|----------------|
| Habitat (wet)           | -          | 0.152          | -          | 0.700            | -          | 0.009            | -          | -0.560           | -             | 0.414          |
|                         |            | [0.055, 0.249] |            | [0.599, 0.801]   |            | [-0.001, 0.019]  |            | [-0.603, -0.518] |               | [0.002, 0.826] |
| Sex (male)              | -          | -              | -          | -2.198           | -          | -0.213           | -          | -1.105           | -             | -              |
|                         |            |                |            | [-2.511, -1.884] |            | [-0.230, -0.196] |            | [-1.256, -0.955] |               | -              |
| <b>Random effects</b>   | $\sigma^2$ | $\sigma^2$     | $\sigma^2$ | $\sigma^2$       | $\sigma^2$ | $\sigma^2$       | $\sigma^2$ | $\sigma^2$       | $\sigma^2$    | $\sigma^2$     |
| Population              | 0.178      | 0.187          | 0.375      | 0.541            | 0.0026     | 0.0039           | 0.071      | 0.104            | 1.002         | 1.111          |
| Container               | 0.042      | 0.059          | 1.976      | 0.613            | 0.0140     | 0.0014           | 0.364      | 0.163            | 0.136         | 0.186          |
| Observation-level       | 0.477      | 0.349          | 0.873      | 0.397            | 0.0069     | 0.0064           | 1.664      | 0.118            | 4.010 (3.290) | 4.010 (3.290)  |
| (Distribution-specific) |            |                |            |                  |            |                  |            |                  |               |                |
| Fixed factors           | -          | 0.066          | -          | 1.479            | -          | 0.0116           | -          | 1.393            | -             | 0.220          |
| $R^2_{\text{GLMM}(m)}$  | -          | 9.96%          | -          | 48.50%           | -          | 49.54%           | -          | 78.34%           | -             | 3.98% (4.57%)  |

|                             |        |        |        |        |        |        |         |        |                |               |
|-----------------------------|--------|--------|--------|--------|--------|--------|---------|--------|----------------|---------------|
| $R^2_{\text{GLMM}(c)}$      | -      | 46.95% | -      | 86.33% | -      | 72.52% | -       | 93.34% | -              | 27.46%        |
|                             |        |        |        |        |        |        |         |        |                | (31.55%)      |
| ICC <sub>[Population]</sub> | 25.33% | 31.30% | 11.53% | 34.44% | 11.38% | 33.17% | 3.40%   | 26.94% | 19.48%         | 20.95%        |
|                             |        |        |        |        |        |        |         |        | (22.64%;)      | (24.23%)      |
| ICC <sub>[Container]</sub>  | 5.94%  | 9.79%  | 60.80% | 39.02% | 59.57% | 12.37% | 17.34%  | 42.34% | 2.64% (3.07%;) | 3.50% (4.05%) |
| AIC                         | 2498.8 | 2412.3 | 4342.6 | 3920.5 | 3379.9 | 3139.5 | 11223.8 | 9004.3 | 605.5          | 589.6         |

95 % CI (confidence intervals) were calculated by the *confint* function in lme4. The observation-level variance was obtained by using the trigamma function. In the Morph models, both the observation-level variance and (theoretical) distribution-specific variance were used; note that ones in brackets use the distribution-specific variance for  $R^2$  and ICC. ICC<sub>[Container]</sub> is not a typical ‘repeatability’ but the proportion of variance due to the container effect beyond the population variance.

## Figure legends

Figure 1. A schematic of how hypothetical datasets are obtained (see the main text for details).

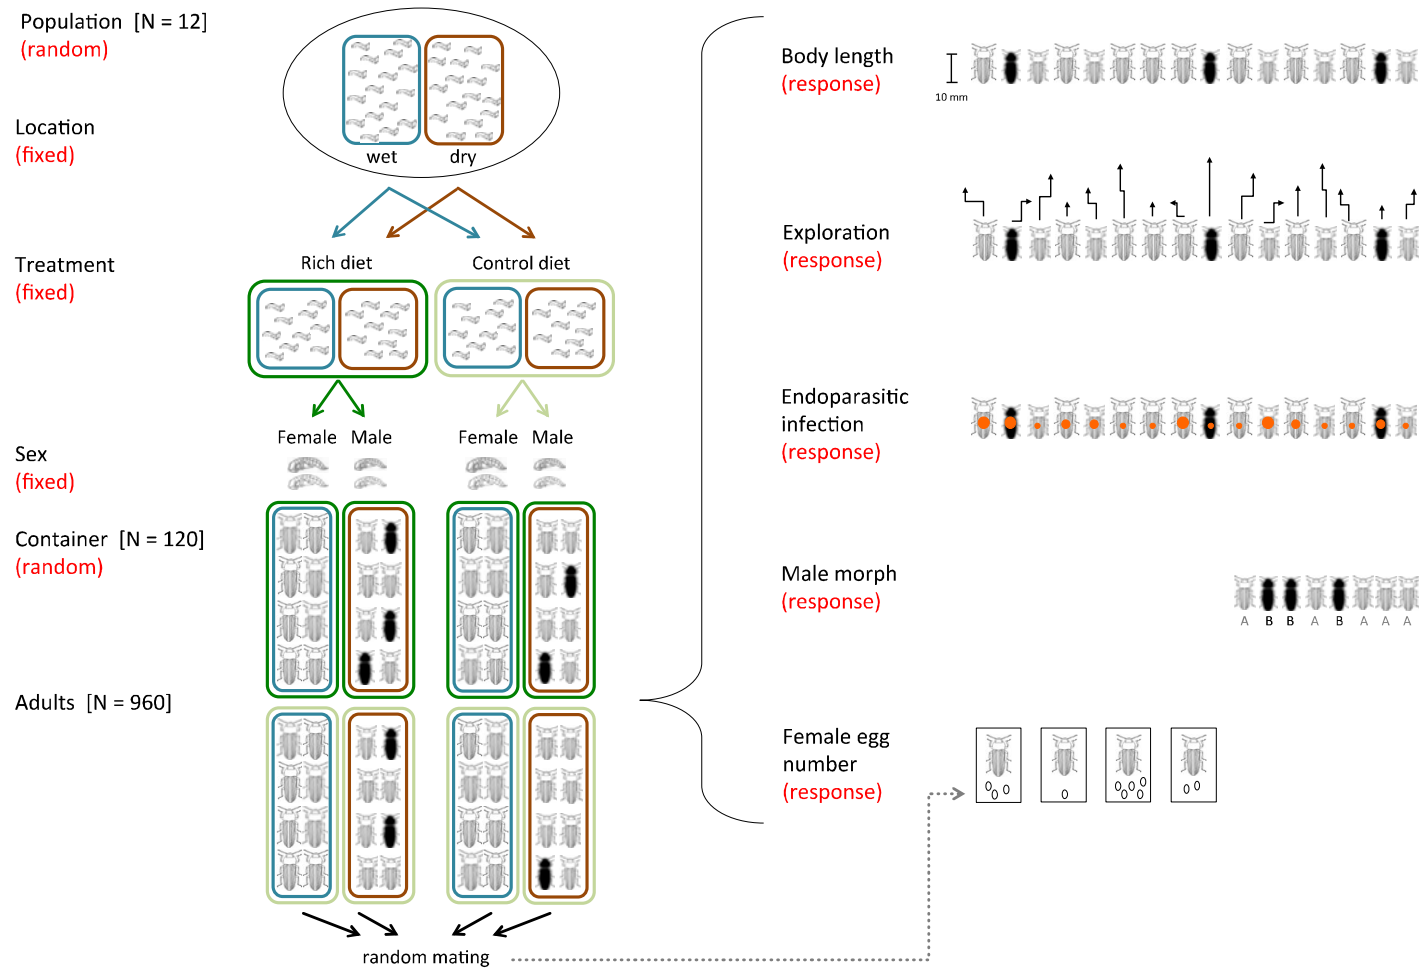

Source: https://www.biorxiv.org/content/10.1101/095851v4.full.pdf
